# Supplementary material for: Genetic variation at aryl hydrocarbon receptor (AHR) loci in populations of Atlantic killifish (Fundulus heteroclitus) inhabiting polluted and reference habitats
Source: PubMed Central journal article supplement (PMC3899389; doi:10.1186/1471-2148-14-6), 2014-01-14

# AHR1 SNP Haplotype Distribution

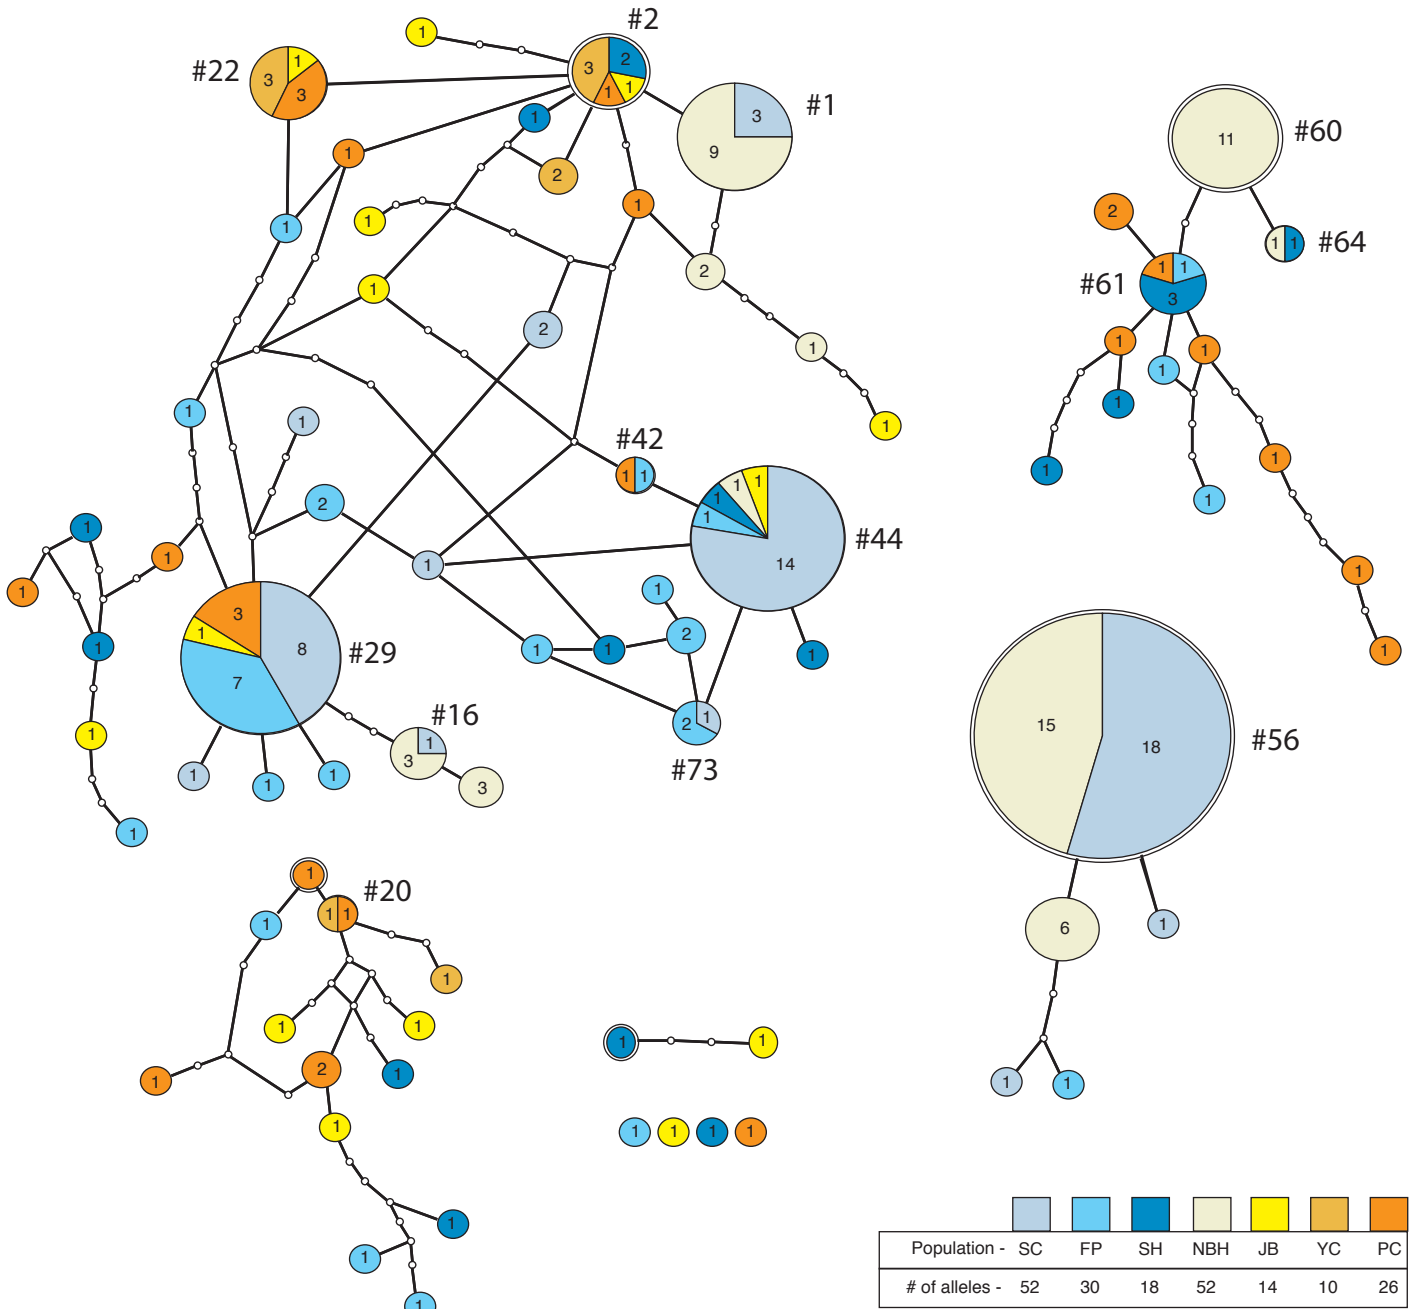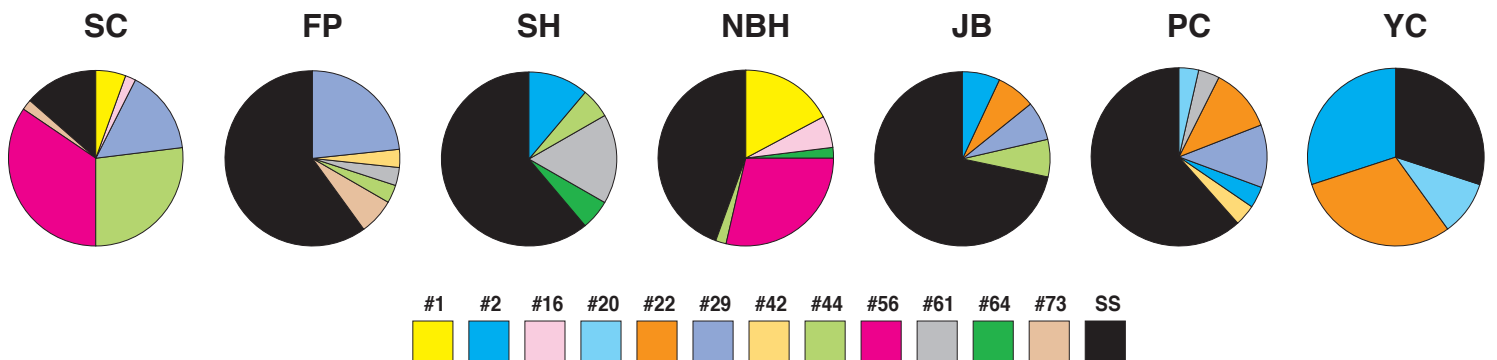

Supplement: 1471-2148-14-6-S1.pdf [file 1471-2148-14-6-S1.pdf]
