# Supplementary material for: Genetic variation at aryl hydrocarbon receptor (AHR) loci in populations of Atlantic killifish (Fundulus heteroclitus) inhabiting polluted and reference habitats
Source: PubMed Central journal article supplement (PMC3899389; doi:10.1186/1471-2148-14-6), 2014-01-14

# AHR2 SNP Haplotype Distribution

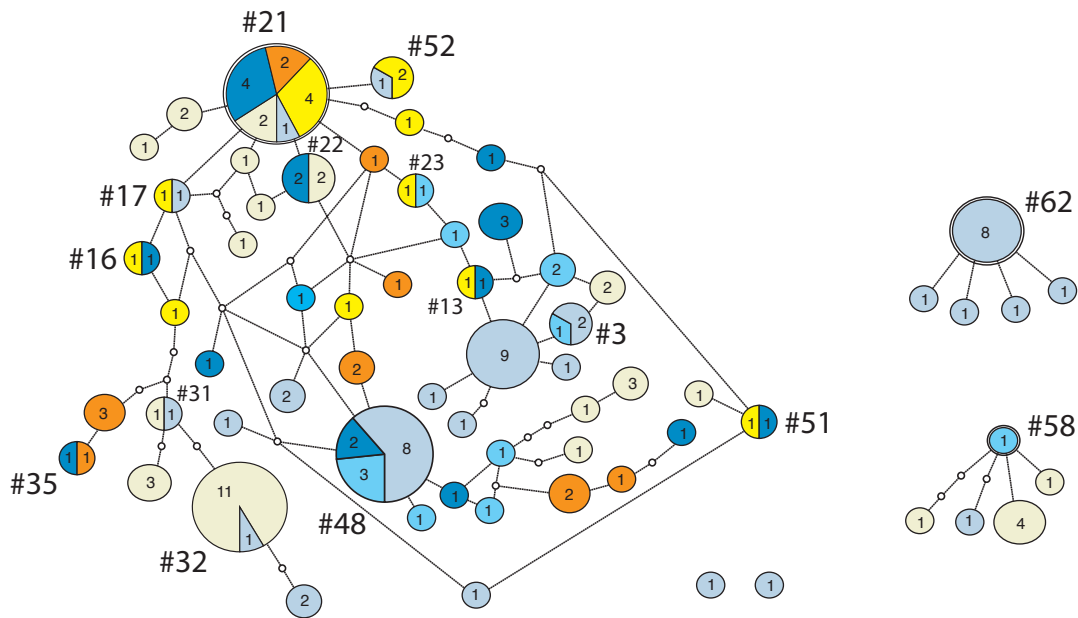

| Population -   | SC | FP | SH | NBH | JB | PC |
|----------------|----|----|----|-----|----|----|
| # of alleles - | 48 | 14 | 18 | 38  | 14 | 14 |

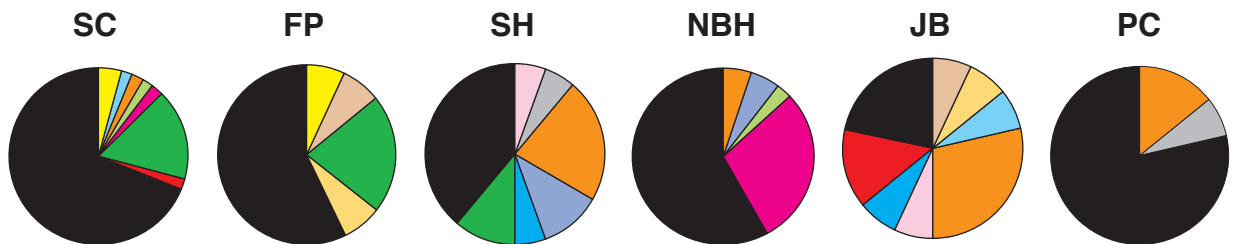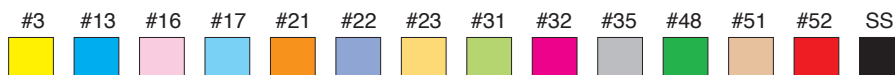

Supplement: 1471-2148-14-6-S2.pdf [file 1471-2148-14-6-S2.pdf]
