# Supplementary material for: Genetic variation at aryl hydrocarbon receptor (AHR) loci in populations of Atlantic killifish (Fundulus heteroclitus) inhabiting polluted and reference habitats
Source: PubMed Central journal article supplement (PMC3899389; doi:10.1186/1471-2148-14-6), 2014-01-14

# AHRR SNP Haplotype Distribution

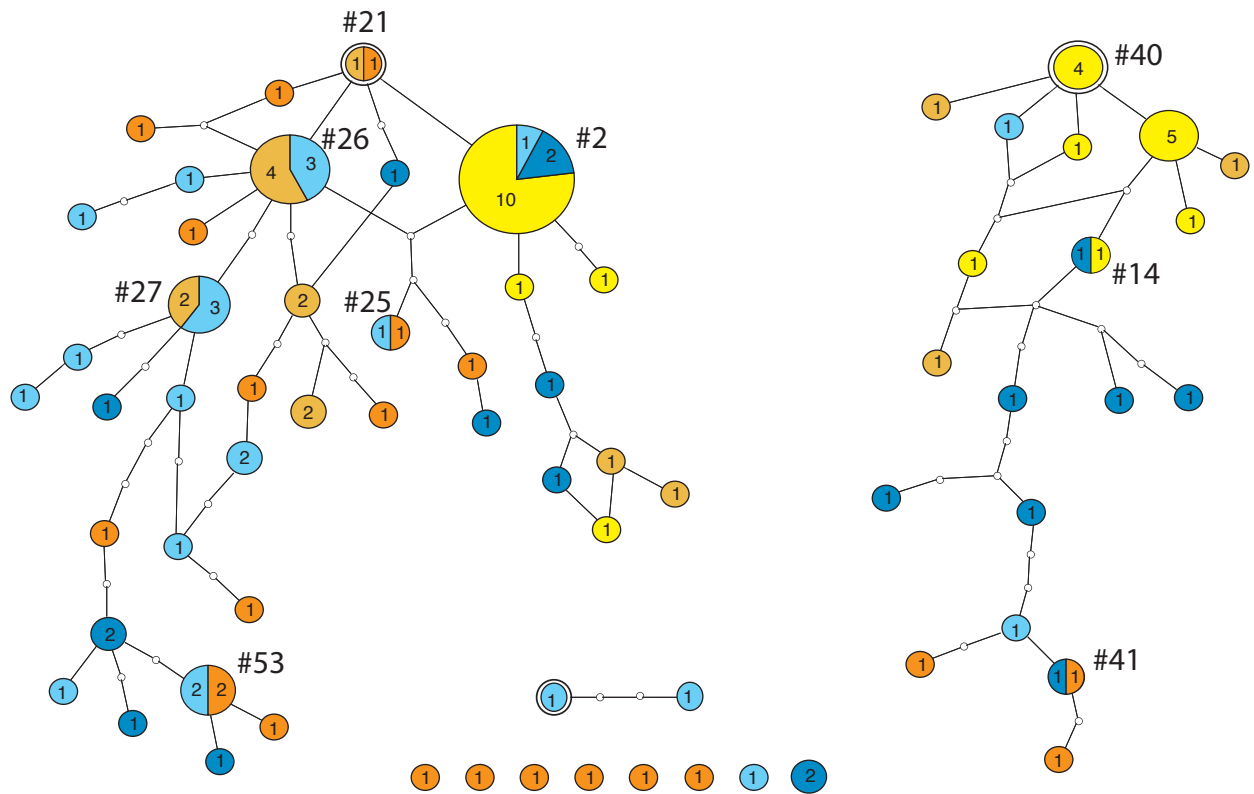

| Population -   | FP | SH | JB | YC | PC |
|----------------|----|----|----|----|----|
| # of alleles - | 24 | 20 | 26 | 16 | 22 |

FP

SH

JB

YC

PC

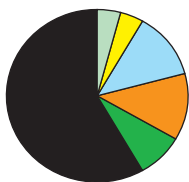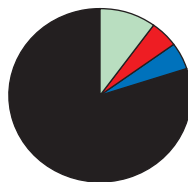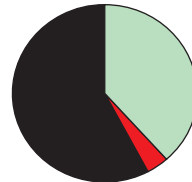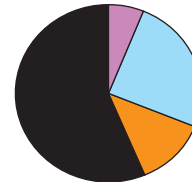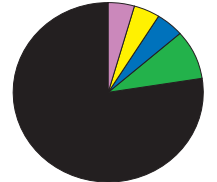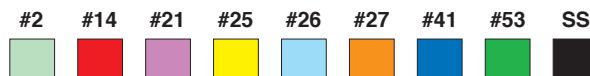

Supplement: 1471-2148-14-6-S3.pdf [file 1471-2148-14-6-S3.pdf]
